# Supplementary material for: Gravitational distribution of regional opening and closing pressures, hysteresis and atelectrauma in ARDS evaluated by electrical impedance tomography
Source: Springer Nature journal article supplement (doi:10.1186/s13054-020-03335-1), 2020-10-22
Supplement: MOESM1 [file 18512218]

## Gravitational distribution of regional opening and closing pressures, hysteresis and atelectrauma in ARDS evaluated by Electrical impedance tomography

Gaetano Scaramuzzo, Elena Spinelli, Savino Spadaro, Alessandro Santini, Donatella Tortolani, Francesca Dalla Corte, Antonio Pesenti, Carlo Alberto Volta, Giacomo Grasselli, Tommaso Mauri.

### *Online data supplement*

**Table S1: Goodness of fit (Gaussian distribution) in each patient.**

| ID | Global                  |                         | Dependent               |                         | Non-dependent           |                         |
|----|-------------------------|-------------------------|-------------------------|-------------------------|-------------------------|-------------------------|
|    | <i>Opening pressure</i> | <i>Closing pressure</i> | <i>Opening pressure</i> | <i>Closing pressure</i> | <i>Opening pressure</i> | <i>Closing pressure</i> |
| 1  | 0,68                    | 0,97                    | 0,81                    | 0,98                    | 0,57                    | 0,90                    |
| 2  | 0,89                    | 0,83                    | 0,85                    | 0,83                    | 0,92                    | -                       |
| 3  | 0,90                    | 0,96                    | 0,80                    | 0,92                    | 0,87                    | 1,00                    |
| 4  | 0,90                    | 0,91                    | 0,89                    | 0,90                    | 0,91                    | 0,92                    |
| 5  | 0,85                    | 0,97                    | 0,79                    | 0,95                    | 0,85                    | 0,99                    |
| 6  | 0,82                    | 0,98                    | 0,88                    | 0,96                    | 0,92                    | 0,91                    |
| 7  | 0,86                    | 0,97                    | 0,90                    | 0,95                    | 0,83                    | 1,00                    |
| 8  | 0,83                    | 0,71                    | 0,79                    | 0,46                    | 0,80                    | 0,63                    |

Goodness ( $R^2$ ) of inflection points gaussian distribution fitting for each patient. Inspiratory and expiratory regional PV curves.

## S2: Individual distribution of opening/closing pressures.

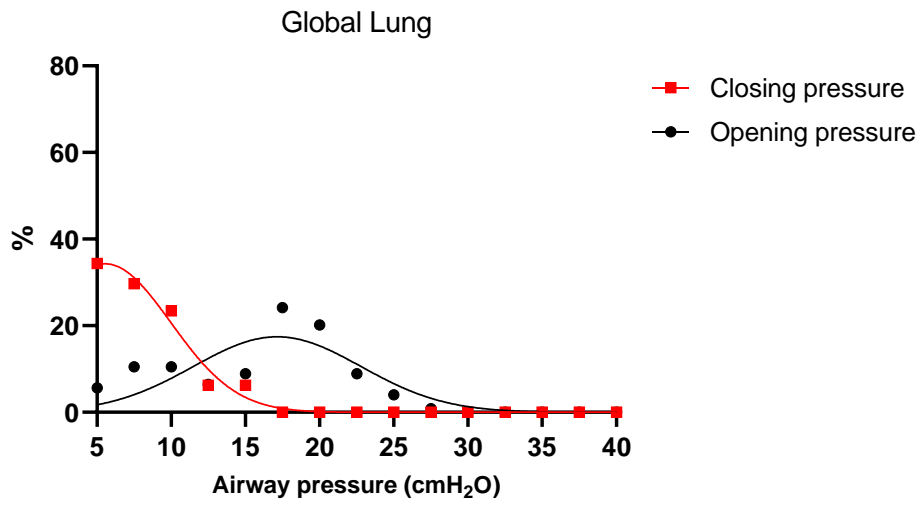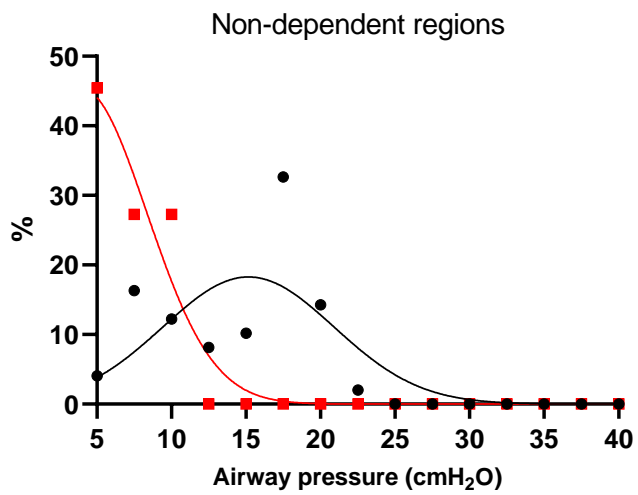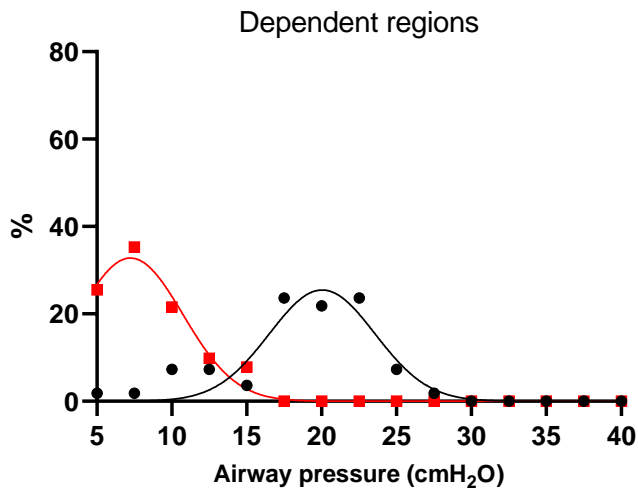

Patient 1

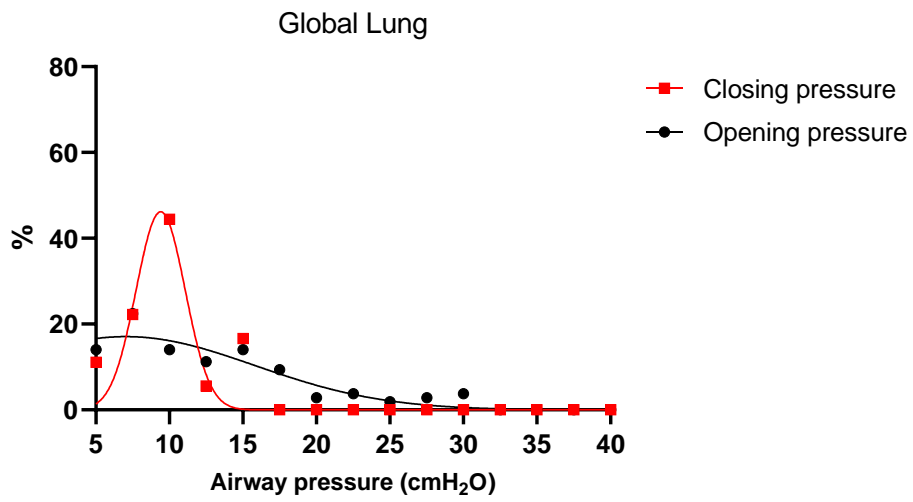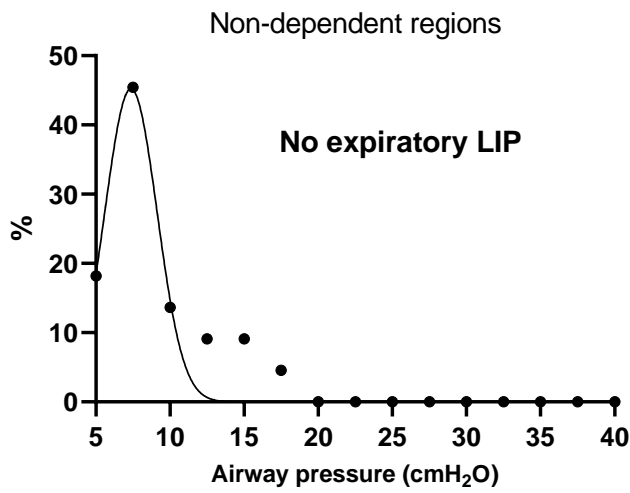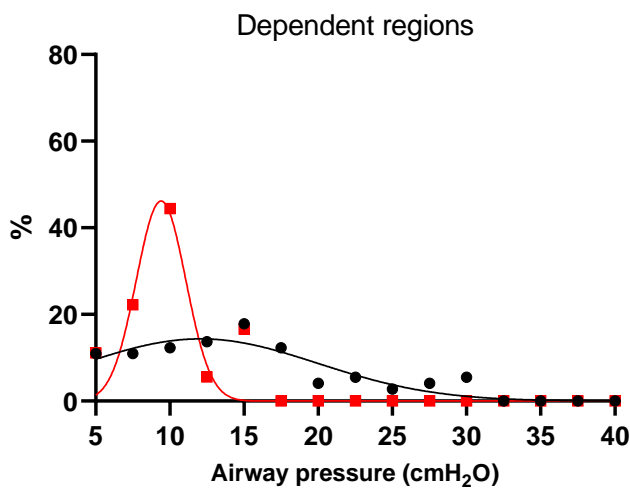

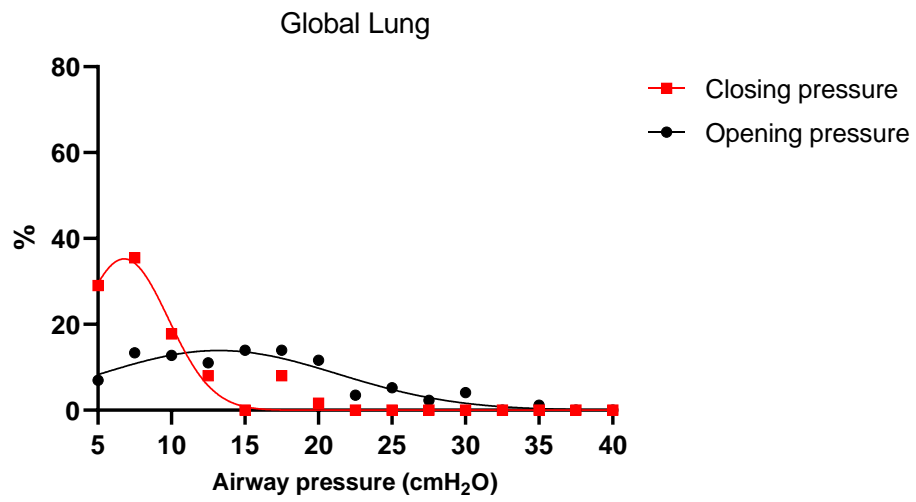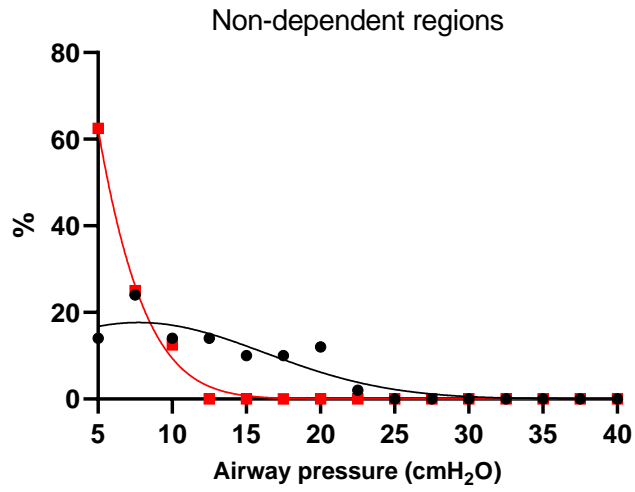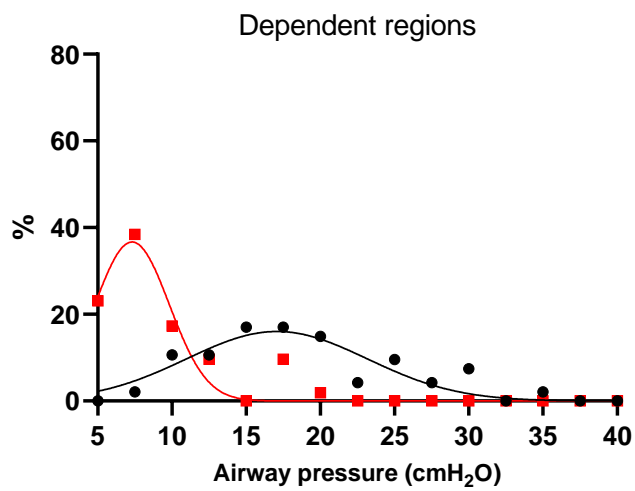

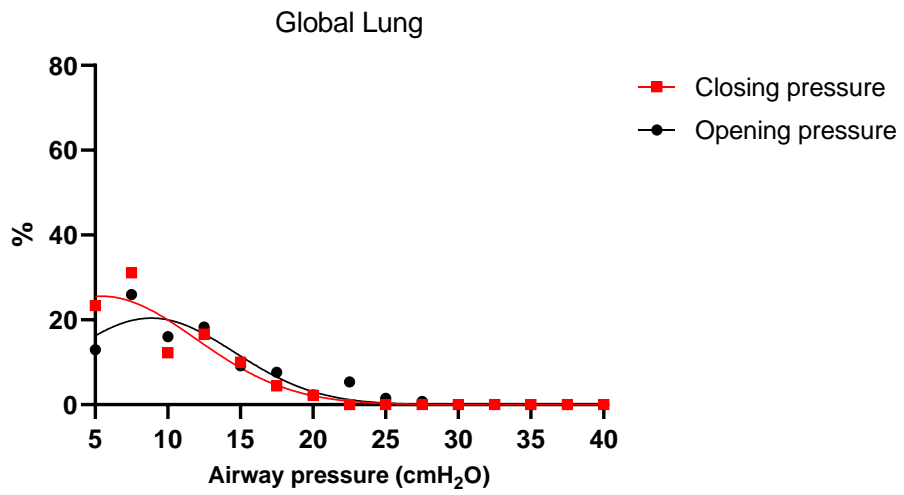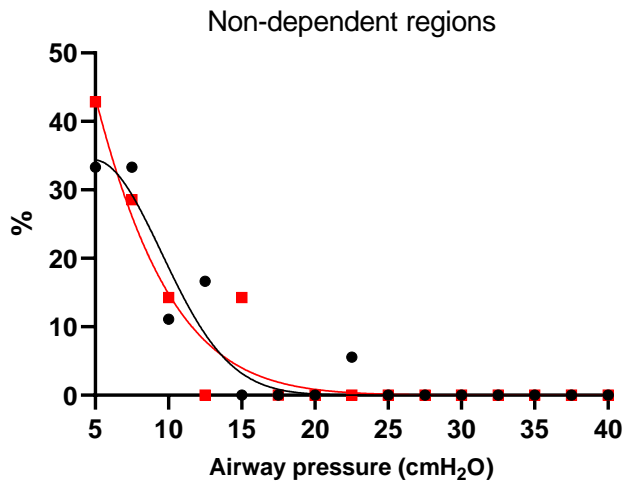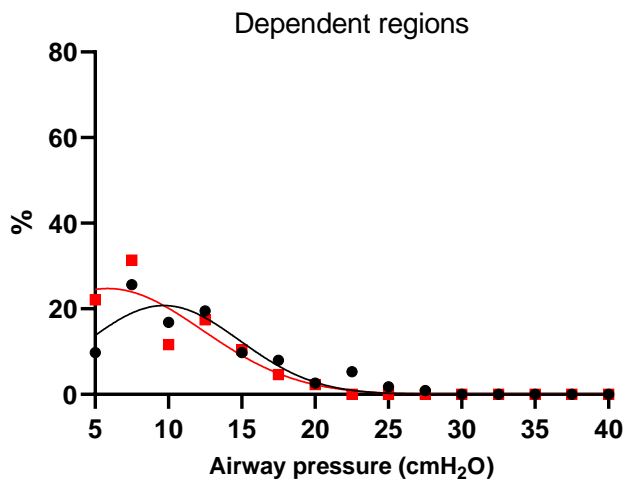

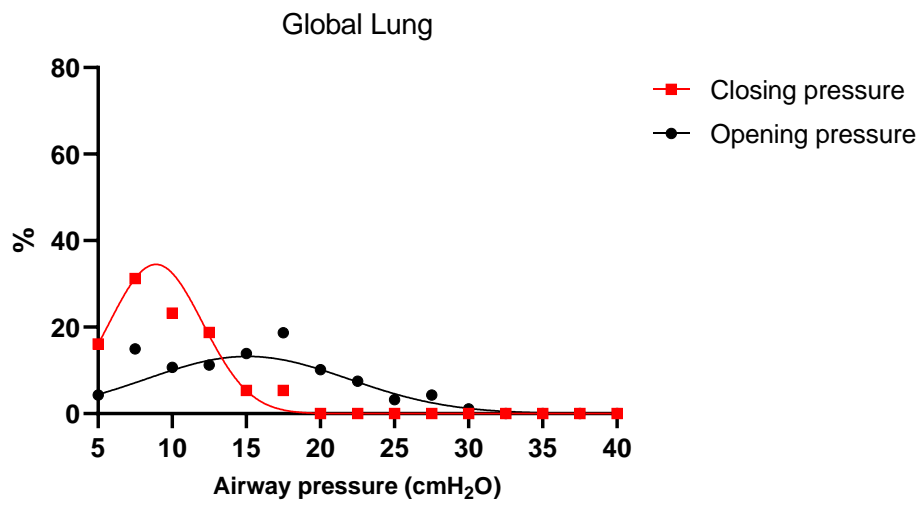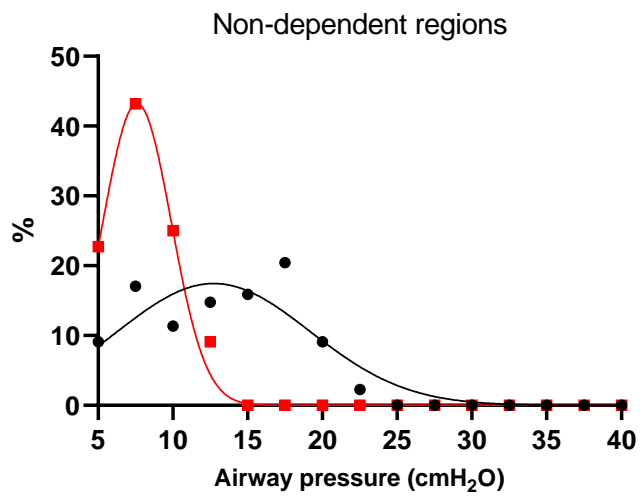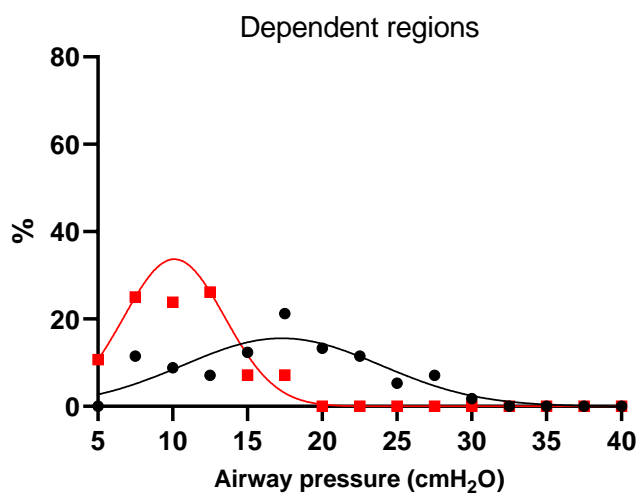

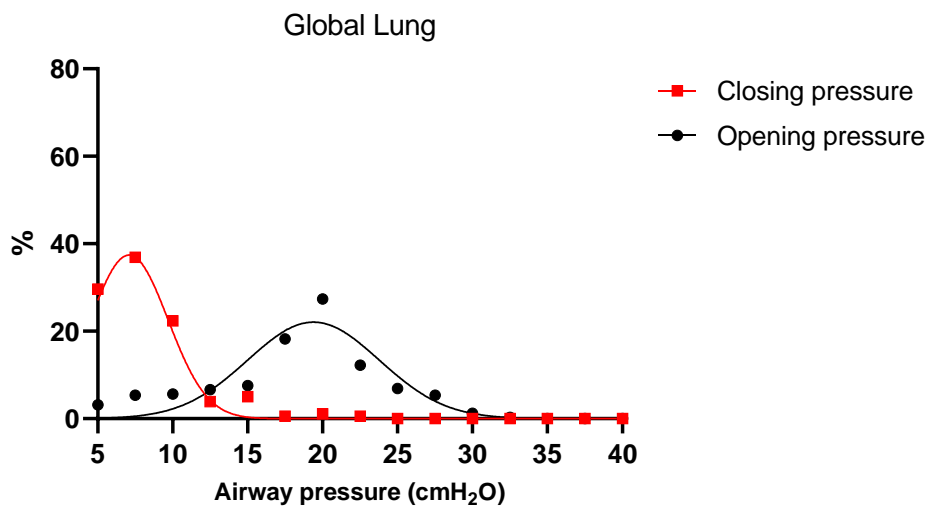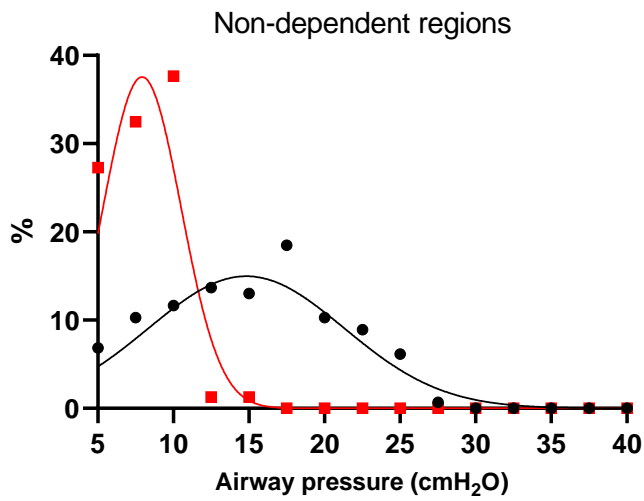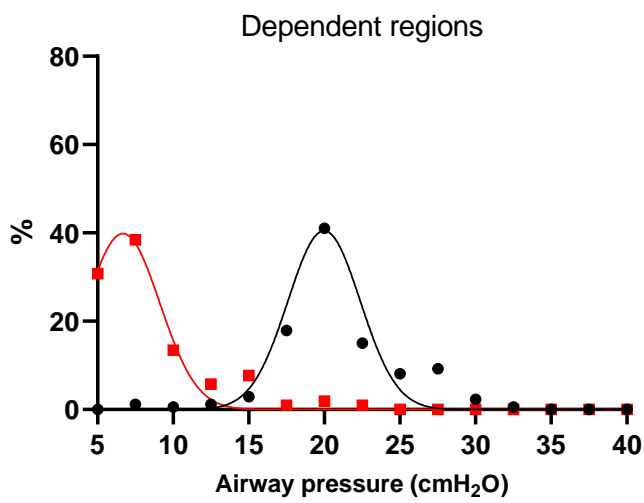

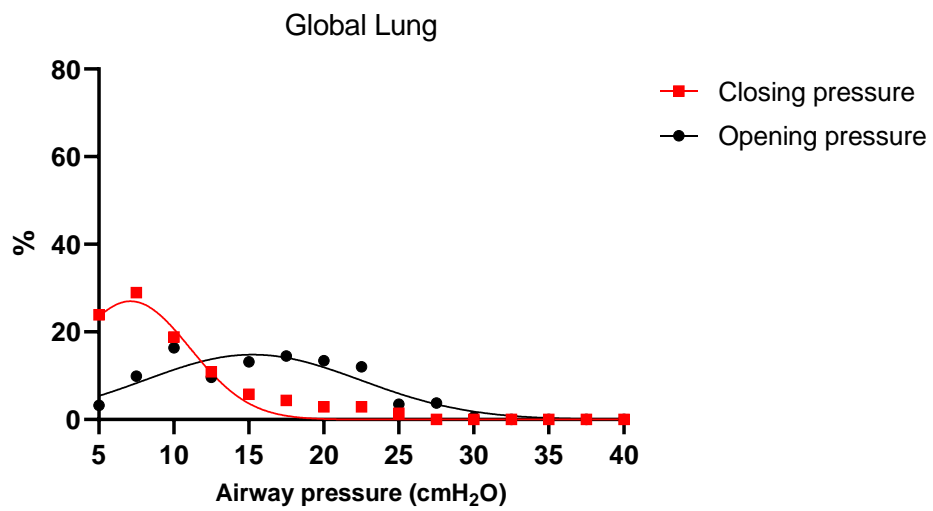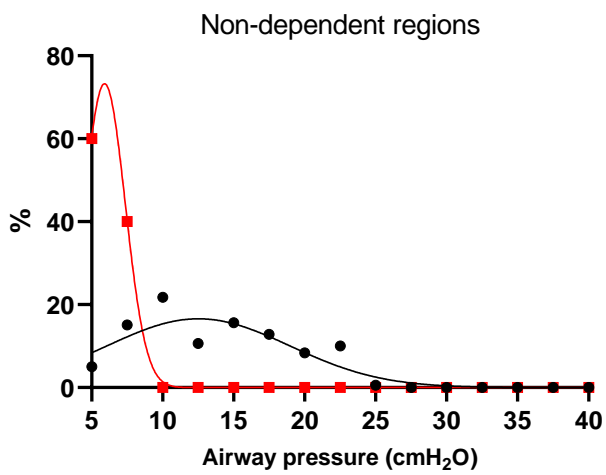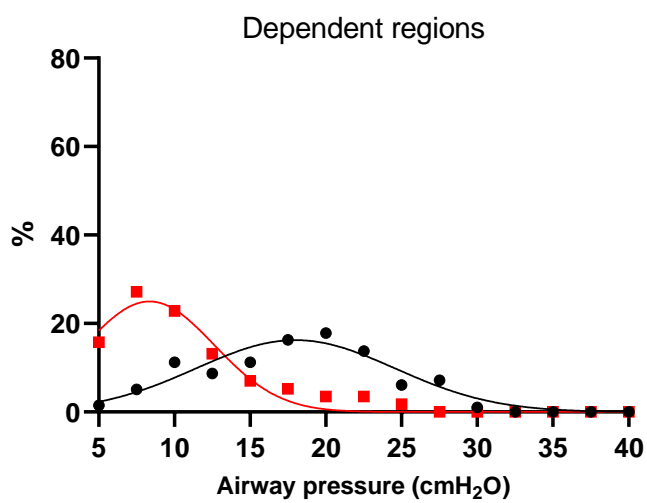



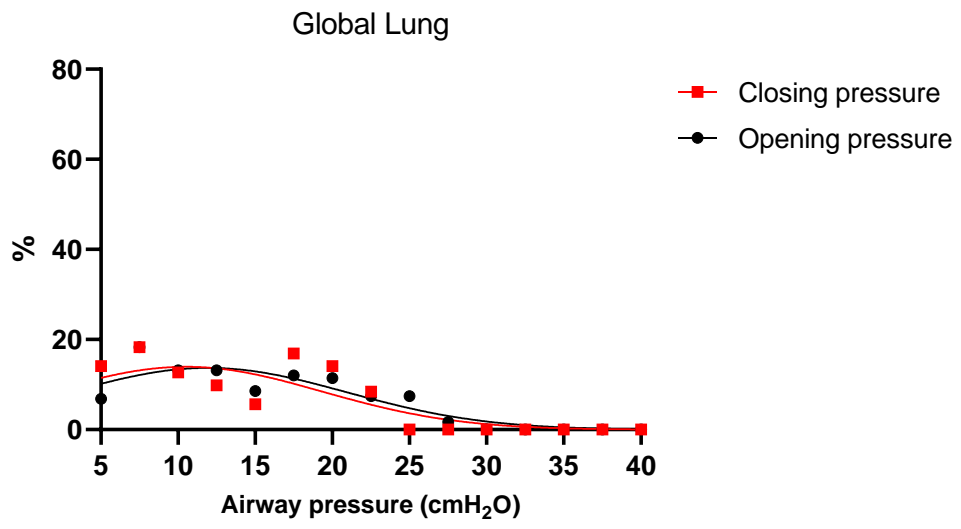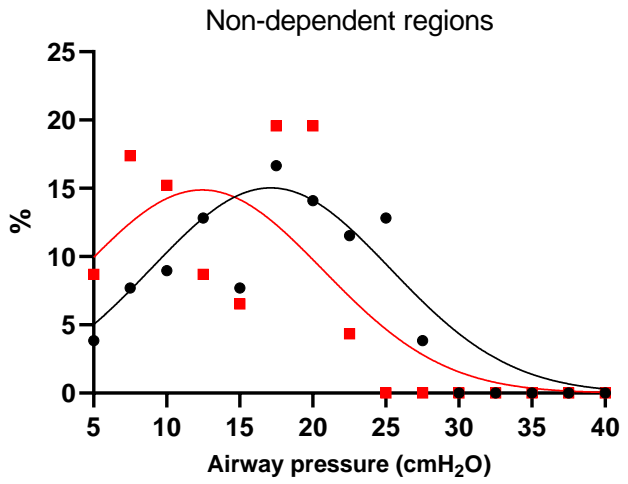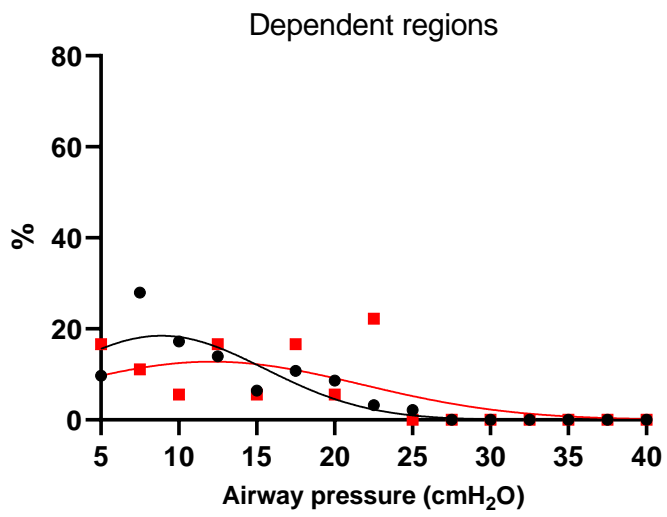

**S3: Number of ventilated pixels, LIP and bad fitting in the inspiratory and expiratory regional PV curves. Individual and global results.**

| Patient      | Inspiratory PV           |                      |                    | Expiratory PV            |                      |                    |
|--------------|--------------------------|----------------------|--------------------|--------------------------|----------------------|--------------------|
|              | <i>Ventilated pixels</i> | <i>Number of LIP</i> | <i>Bad fitting</i> | <i>Ventilated pixels</i> | <i>Number of LIP</i> | <i>Bad fitting</i> |
| 1            | 339                      | 142                  | 0                  | 346                      | 145                  | 2                  |
| 2            | 522                      | 220                  | 0                  | 529                      | 44                   | 0                  |
| 3            | 391                      | 206                  | 0                  | 393                      | 147                  | 0                  |
| 4            | 542                      | 241                  | 0                  | 543                      | 217                  | 0                  |
| 5            | 439                      | 248                  | 2                  | 465                      | 160                  | 3                  |
| 6            | 489                      | 352                  | 0                  | 498                      | 310                  | 0                  |
| 7            | 507                      | 418                  | 3                  | 485                      | 288                  | 0                  |
| 8            | 400                      | 222                  | 6                  | 398                      | 107                  | 2                  |
| <i>Total</i> | 3629                     | 2049 (56.5%)         | 11 (0.3%)          | 3657                     | 1418 (38.8%)         | 7 (0.2%)           |

**S4: HysMAX and PaoHysMAX calculation in a representative patient.**

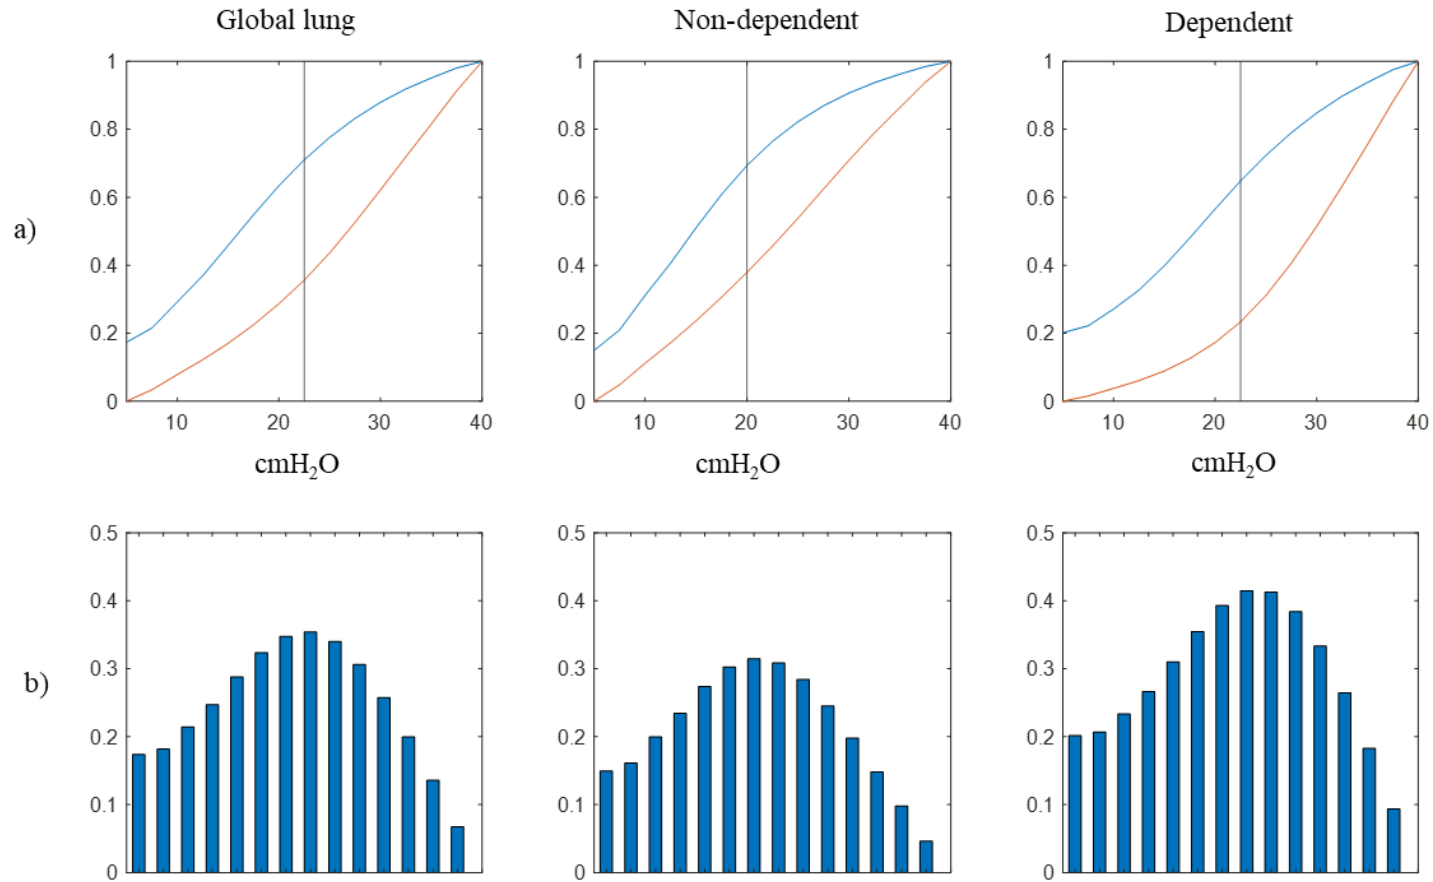

a) Inspiratory (red) and expiratory (blue) pressure-volume curves for the global, dependent and non-dependent lung. Each curve was normalized between 0 and 1.  
 b) difference, at each pressure interval of 2.5 cmH<sub>2</sub>O, between the expiratory and inspiratory limb of the PV curve of the corresponding curves. The vertical line in a) represents the level of HysMAX and PaoHysMAX.

**Table S5: Opening/closing pressure distribution comparison**

|                         | <i>Opening pressure</i> |           |             | <i>Closing pressure</i> |           |             |            |                    |
|-------------------------|-------------------------|-----------|-------------|-------------------------|-----------|-------------|------------|--------------------|
|                         | <i>AREA</i>             | <i>SD</i> | <i>Mean</i> | <i>AREA</i>             | <i>SD</i> | <i>Mean</i> | <i>p</i> * | <i>F(DFn, DFd)</i> |
| <b><i>Global</i></b>    | 293                     | 8         | 13.5        | 332.5                   | 5.1       | 6.8         | <0.0001    | 24.75 (3, 24)      |
| <b><i>Dependent</i></b> | 268,5                   | 7.6       | 16.1        | 300.4                   | 4.8       | 7.6         | <0.0001    | 44.66 (3, 24)      |
| <b><i>Non-dep</i></b>   | 352,9                   | 9         | 9.1         | 321.4                   | 3.8       | 5.1         | <0.0001    | 34.19 (3, 24)      |
| <hr/>                   |                         |           |             |                         |           |             |            |                    |
|                         | <i>Dependent</i>        |           |             | <i>Non-dependent</i>    |           |             | <i>p</i> * | <i>F(DFn, DFd)</i> |
| <b><i>Opening</i></b>   | 268.5                   | 7.6       | 16.1        | 352.9                   | 9         | 9.1         | 0.0008     | 7.930 (3, 24)      |
| <b><i>Closing</i></b>   | 300.4                   | 4.8       | 7.6         | 321.4                   | 3.8       | 5.1         | <0.0001    | 20.13 (3, 24)      |

Comparison of gaussian distributions between opening/closing pressures and between dependent/non-dependent lung regions. Extra sum of squares, F test.

**Figure S6: Comparison of regional compliance between the non-dependent and the dependent lung region**

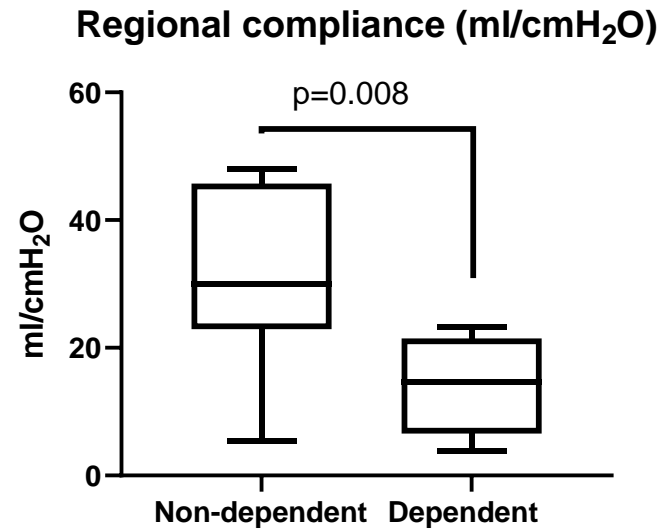

Regional compliances were calculated using the relative variation of volume in each ROI during the PV maneuver on the variation of pressure (35 cmH<sub>2</sub>O ) used to perform the maneuver.
